# Evidence for an Epistatic Effect between *TP53* R72P and *MDM2* T309G SNPs in HIV Infection: A Cross-Sectional Study in Women from South Brazil

Fernando Pires Hartwig<sup>1,3\*</sup>, Ludmila Gonçalves Entiauspe<sup>2,3‡</sup>, Emily Montosa Nunes<sup>3</sup>, Fernanda Martins Rodrigues<sup>3</sup>, Tiago Collares<sup>2,3</sup>, Fabiana Kömmling Seixas<sup>2,3</sup>, Mariângela Freitas da Silveira<sup>1,4</sup>

**1** Postgraduate Program in Epidemiology, Department of Social Medicine, Faculty of Medicine, Federal University of Pelotas, Pelotas, Rio Grande do Sul, Brazil,

**2** Postgraduate Program in Biotechnology, Technology Development Center (Biotechnology Unit), Federal University of Pelotas, Pelotas, Rio Grande do Sul, Brazil,

**3** Molecular and Cellular Oncology Research Group, Biotechnology Unit, Technology Development Center, Federal University of Pelotas, Pelotas, Rio Grande do Sul, Brazil,

**4** Maternal and Child Department, Faculty of Medicine, Federal University of Pelotas, Pelotas, Rio Grande do Sul, Brazil

## Abstract

**Objective:** To investigate the associations of *TP53* R72P and *MDM2* T309G SNPs with HPV infection status, HPV oncogenic risk and HIV infection status.

**Design:** Cross-sectional study combining two groups (150 HIV-negative and 100 HIV-positive) of women.

**Methods:** Data was collected using a closed questionnaire. DNA was extracted from cervical samples. HPV infection status was determined by nested-PCR, and HPV oncogenic risk group by Sanger sequencing. Both SNPs were genotyped by PCR-RFLP. Crude and adjusted associations involving each exposure (R72P and T309G SNPs, as well as 13 models of epistasis) and each outcome (HPV status, HPV oncogenic risk group and HIV infection) were assessed using logistic regression.

**Results:** R72P SNP was protectively associated with HPV status (overdominant model), as well as T309G SNP with HPV oncogenic risk (strongest in the overdominant model). No epistatic model was associated with HPV status, but a dominant (R72P over T309G) protective epistatic effect was observed for HPV oncogenic risk. HIV status was strongly associated (risk factor) with different epistatic models, especially in models based on a visual inspection of the results. Moreover, HIV status was evidenced to be an effect mediator of the associations involving HPV oncogenic risk.

**Conclusions:** We found evidence for a role of R72P and T309G SNPs in HPV status and HPV oncogenic risk (respectively), and strong associations were found for an epistatic effect in HIV status. Prospective studies in larger samples are warranted to validate our findings, which point to a novel role of these SNPs in HIV infection.

**Citation:** Hartwig FP, Entiauspe LG, Nunes EM, Rodrigues FM, Collares T, et al. (2014) Evidence for an Epistatic Effect between *TP53* R72P and *MDM2* T309G SNPs in HIV Infection: A Cross-Sectional Study in Women from South Brazil. PLoS ONE 9(2): e89489. doi:10.1371/journal.pone.0089489

**Editor:** Klaus Roemer, University of Saarland Medical School, Germany

**Received:** November 15, 2013; **Accepted:** January 22, 2014; **Published:** February 28, 2014

**Copyright:** © 2014 Hartwig et al. This is an open-access article distributed under the terms of the Creative Commons Attribution License, which permits unrestricted use, distribution, and reproduction in any medium, provided the original author and source are credited.

**Funding:** This work was supported by the Brazilian National Council for Scientific and Technological Development (CNPq; <http://memoria.cnpq.br/english/cnpq/index.htm>). The funder had no role in study design, data collection and analysis, decision to publish, or preparation of the manuscript.

**Competing Interests:** The authors have declared that no competing interests exist.

\* E-mail: fernandophartwig@gmail.com

‡ Current address: Postgraduate Program in Epidemiology, Department of Social Medicine, Faculty of Medicine, Federal University of Pelotas, Pelotas, Rio Grande do Sul, Brazil

## Introduction

Infection susceptibility variability among individuals is observable in many infectious diseases. Understanding such variation and identifying its causal factors may have important implications for clinical practice and population health. Although intra and inter-population variation of viral infection susceptibility is attributable to several factors, host genetics likely plays an important role. Regarding HIV infection, a common example of genetic resistance is the *CCR5* 32-bp deletion. This allele, when transcribed and translated, results in a non-functional receptor, thus providing resistance to HIV infection [1]. Importantly, these findings are currently being incorporated into therapeutic approaches [2,3], thus evidencing that understanding the genetic

basis of viral infection susceptibility have practical implications for human health. In this regard, several genome-wide association studies (GWAS) have been conducted to investigate the roles of host genetics in HIV load and/or disease progression [4–14], and, more recently, some GWAS focused on genetic factors associated with HIV acquisition in different populations [15–20]. Such attempts indicate the importance given to host genetics regarding HIV pathogenesis.

Considering that HIV infection is considered a major risk factor for HPV infection, the identification of host genetic factors involved with HIV infection may also have implications for HPV-related outcomes. Given the well-established roles of HPV in cancer, the majority of the studies involving HPV and host

genetics are related with cancer development and/or progression associated with infection by oncogenic HPV strains. In this context, p53 pathway genes have been extensively studied given that oncogenic HPV E6 orchestrates, in association with E6AP, p53 degradation by the ubiquitin-proteasome system [21]. The oncogenic effects of HPV have also been investigated epidemiologically (in different populations) using genetic variants in p53 pathway genes, including the *TP53* R72P SNP (rs1042522) [22–24], which was evidenced to interfere with p53 apoptotic and transcriptional functions [25–27]. More recently, the *MDM2* T309G SNP (rs2279744) [28–30], which influences p53 activity by affecting *MDM2* transcription, have also been investigated in similar contexts [31,32].

In a recent review, different biological mechanisms by which interfering with p53 pathway may impact viral infection (or virus persistence after exposure to it) were proposed [33]. In addition, there are substantial amounts of *in vitro* evidence supporting a functional relationship between p53 and different HIV proteins (with evidence for implications for p53-mediated apoptosis), as well as some evidence regarding MDM2. These functional relationships with the p53 pathway have been evidenced for gp120 [34,35], Rev, Tat [36] and Vpu [37] proteins. Considering the roles of R72P and T309G SNPs in p53 apoptosis and regulation (respectively) and the evidence for a role of p53 pathway in HPV and HIV biology, we aimed to investigate the association of these SNPs with HPV infection status, HPV oncogenic risk and HIV infection status.

## Materials and Methods

### Study Design and Participants

We performed a cross-sectional study, selecting two independent groups of women based on HIV status (determined by medical diagnosis). From May 2010 to May 2011, 250 (150 HIV-negative and 100 HIV-positive) women seeking gynecologic care at the gynecological ambulatory clinic of Faculty of Medicine of Federal University of Pelotas (South Brazil) that fulfilled eligibility criteria (not pregnant, sexually active, and not menstruating) and agreed to participate were sequentially included in the study. Data were collected using an adapted version of a closed questionnaire [38], which was applied by a trained female interviewer. Routine gynecological exams (cervicitis indicators, visual inspection with acetic acid and Lugol's iodine), were performed and included in the questionnaire, as well the patient's recorded information (last Pap test result).

### Ethics Statement

The study was approved by the Ethics Committee of the Faculty of Medicine of Federal University of Pelotas (June 2009). Written informed consent was obtained from all participants. All procedures were performed in accordance with the Helsinki Declaration guidelines.

### DNA Collection

Cervical samples were collected with a cytobrush and placed into 1.5 ml microtubes containing 300 µl of Cell Lysis Solution (Puregene™ DNA Extraction Kit, *Genra Systems* Minneapolis, MN). The material was enzymatically digested using 1.5 µl of proteinase K (10 mg/ml, New England Biolabs, MA) and incubated overnight at room temperature. DNA was extracted according to manufacturer's specifications.

### HPV Detection and Genotyping

HPV detection was performed using nested-PCR in two rounds: amplification of a 450 bp fragment using the MY09/11 primer pair [39] and amplification of a 140 bp fragment using the GP5/6 primer pair [40]. MY90/11 and GP5/6 PCRs (final reaction volume of 25 µl) were performed as follows: initial denaturation for 9 min at 95°C; 40 cycles of denaturation (for 1 min at 95°C and for 30 s at 94°C, respectively), primer annealing (for 1 min at 55°C and 30 s at 45°C, respectively), and extension (for 1 min and for 30 s, respectively, at 72°C); and final extension for 5 min at 72°C [41,42]. PCR amplicons were visualized on 2.0% agarose gels stained with GelRed™ (Biotium Inc., CA). HPV-positive amplicons (from the second nested-PCR round) were purified using Gel Band purification kit (GE Healthcare, USA) according to manufacturer's instructions. To determine HPV oncogenic risk group (i.e., HPV genotype), Sanger sequencing was performed in a MegaBACE 1000 DNA sequencer (GE Healthcare, USA) using Dynamic ET-terminator technology. Chromatograms were assembled and analyzed using the ContigExpress module of the Vector NTI 10.0 suite (Invitrogen, USA). The assembled sequences were submitted to BLAST alignment ([www.ncbi.nlm.nih.gov/BLAST](http://www.ncbi.nlm.nih.gov/BLAST)) against sequences available in GenBank.

Both SNPs were genotyped by PCR-RFLP using GoTaq qPCR Master Mix (Promega, USA) (in 12 µl reactions) with primers, restriction enzymes and PCR conditions described previously [43–45]. Briefly, for the R72P SNP, the 199 bp amplicon was cleaved using *Bst*UI (New England Biolabs, MA) and loaded on 2.5% agarose gel stained with GelRed™ (Biotium Inc., CA). Genotyping was performed as follows: one fragment of 199 bp corresponds to P72P genotype; three fragments of 199 bp, 113 bp and 86 bp correspond to R72P genotype; and two fragments of 113 bp and 86 bp correspond to R72R genotype. For the T309G SNP, the 157 bp amplicon was cleaved by *Msp*AII (New England Biolabs, MA) and loaded on 2.5% agarose gel stained with GelRed™. Genotyping was performed as follows: one fragment of 157 bp corresponds to T309T genotype; three fragments of 157 bp, 109 bp and 48 bp correspond to T309G genotype; and two fragments of 109 bp and 48 bp correspond to G309G genotype.

### Statistical Analyses

Analyses were performed in R (version 3.0.1, <http://www.r-project.org/>). Descriptive analyses were stratified according to HIV infection status for both SNPs [including assessing Hardy-Weinberg equilibrium (HWE) by Fisher's exact test using the "genetics" R package: <http://cran.r-project.org/web/packages/genetics/>], status of HPV infection (positive or negative), HPV oncogenic risk (high or low) and potential confounding variables (i.e., skin color, achieved schooling in years, family income in minimum salaries and age). Skin color was a categorical variable defined by interviewer's observation. Achieved schooling in years was categorized in illiterate, 1–4, 5–8, 9–11 and 11 or more according to the formal educational system that the recruited women frequented [composed of: 8 years or Primary Education, which changes substantially after the first 4 years; Secondary Education, composed of 3 years (in a total of 11 years); and Higher Education]. Age was categorized in groups of (approximately) 5 years (adjusting the age limits of some groups to avoid categories with very few individuals) for a more detailed comparison between HIV groups. Crude comparisons between HIV strata were performed by either chi-squared or Fisher's exact test (using the "gmodels" R package: <http://cran.r-project.org/web/packages/gmodels/index.html>).

Importantly, any confounding effect of age, education and family income (after adjusting for skin color) on the association

**Table 1.** Descriptive analyses of the sample, comparing the HIV groups.

| Variable           | Categories | HIV status         |                    | P-value |
|--------------------|------------|--------------------|--------------------|---------|
|                    |            | Negative (n = 250) | Positive (n = 100) |         |
| HPV status         | Positive   | 176 (70.4%)        | 32 (32.0%)         | <0.001* |
|                    | Negative   | 74 (29.6%)         | 68 (68.0%)         |         |
| HPV oncogenic risk | Low-risk   | 7 (10.1%)          | 38 (66.7%)         | <0.001* |
|                    | High-risk  | 62 (89.9%)         | 19 (33.3%)         |         |
| Age groups         | 18–24      | 43 (17.2%)         | 3 (3.0%)           | <0.001† |
|                    | 25–30      | 55 (22.0%)         | 10 (10.0%)         |         |
|                    | 31–35      | 45 (18.0%)         | 17 (17.0%)         |         |
|                    | 36–39      | 50 (20.0%)         | 17 (17.0%)         |         |
|                    | 40–45      | 57 (22.8%)         | 53 (53.0%)         |         |
| Skin color         | White      | 164 (65.6%)        | 51 (51.0%)         | 0.005*  |
|                    | Black      | 31 (12.4%)         | 26 (26.0%)         |         |
|                    | Brown      | 55 (22.0%)         | 23 (23.0%)         |         |
| Family income      | ≤1: 50     | 50 (26.6%)         | 27 (30.7%)         | 0.389*  |
| (minimum salaries) | >1, ≤2     | 80 (42.6%)         | 33 (37.5%)         |         |
|                    | >2, ≤3     | 46 (24.5%)         | 18 (20.5%)         |         |
|                    | ≥4         | 12 (6.4%)          | 10 (11.4%)         |         |
| Achieved schooling | Illiterate | 4 (1.6%)           | 0 (0.0%)           | <0.001* |
|                    | (years)    | 1–4                | 32 (13.0%)         |         |
|                    |            | 5–8                | 93 (37.8%)         |         |
|                    |            | 9–10               | 36 (14.6%)         |         |
|                    |            | ≥11                | 81 (32.9%)         |         |
| R72P               | R72R       | 27 (10.8%)         | 18 (18.0%)         | 0.200*  |
|                    | R72P       | 118 (47.2%)        | 43 (43.0%)         |         |
|                    | P72P       | 105 (42.0%)        | 39 (39.0%)         |         |
| T309G              | T309T      | 35 (14.0%)         | 16 (16.0%)         | 0.543*  |
|                    | T309G      | 101 (40.4%)        | 45 (45.0%)         |         |
|                    | G309G      | 114 (45.6%)        | 39 (39.0%)         |         |

\*Fisher's exact test.

†Chi-square test.

doi:10.1371/journal.pone.0089489.t001

between a genetic factor and a given trait is expected to occur by chance (since an individual's genotype is not influenced by environmental factors), thus imposing a difficulty to establish an adequate conceptual framework to select confounding variables. Therefore, we used a statistical-oriented approach, although skin color was invariably adjusted for. The reason for doing so is the well-known possibility of confounding in SNP-outcome analyses due to population stratification. Since both socioeconomic status (in several populations including Brazil) and genotypic frequencies of the vast majority of SNPs vary substantially according to skin color, the last can create spurious associations between genetic factors and outcomes influenced by socioeconomic factors. This is relevant for this manuscript since the last are known to have profound implications for sexually transmitted diseases.

The confounding variable selection was performed by stepwise backwards selection (critical  $P=0.2$  according to likelihood-ratio chi-squared test using the "car" R package: <http://cran.r-project.org/web/packages/car/index.html>). Since skin color was invariably adjusted for due to conceptual considerations, it was not subjected to removal. This process was performed having, as the independent variable, each outcome of the study (i.e., HPV status,

HPV oncogenic risk and HIV status) and each main exposure (R72P and T309G genotypes, as well as the genotypes combined). These analyses were performed by logistic and multinomial logistic regression (using the "nnet" R package: <http://cran.r-project.org/web/packages/nnet/index.html>), respectively. The variables that remained in the final models of the outcome and the genetic exposure of interest were considered confounding factors for the associations involving such exposure-outcome pair.

Associations involving R72P and T309G SNPs and study outcomes were assessed in crude and adjusted logistic regression [estimating odds ratio (OR)] models. Five genetic models (obtained using the "SNPassoc" R package: <http://cran.r-project.org/web/packages/SNPassoc/index.html>) were tested: codominant or genotypic (i.e., each genotype is coded as a distinct category), additive (i.e., the SNPs are coded numerically according to the number of variant alleles), overdominant (i.e., homozygous genotypes = 0 and heterozygous genotype = 1), dominant (i.e., homozygous wild = 0; heterozygous and homozygous variant genotype = 1) and recessive (i.e., homozygous wild and heterozygous genotypes = 0 and homozygous variant genotype = 1), with the category corresponding to (or containing) the wild-type

**Table 2.** Crude and adjusted associations [showing OR (95% CI) and p-values] between R72P and T309G SNPs and HPV status.

| Genetic model*                | R72P             |                  | T309G            |                  |
|-------------------------------|------------------|------------------|------------------|------------------|
|                               | Crude            | Adjusted         | Crude            | Adjusted         |
| <b>Codominant</b>             | P = 0.071        | P = 0.065        | P = 0.786        | P = 0.859        |
| A/A                           | 1 (Reference)    | 1 (Reference)    | 1 (Reference)    | 1 (Reference)    |
| A/a                           | 0.63 (0.40–1.00) | 0.62 (0.39–0.99) | 1.18 (0.74–1.87) | 1.14 (0.71–1.84) |
| a/a                           | 1.16 (0.59–2.28) | 1.14 (0.57–2.28) | 1.12 (0.58–2.12) | 1.08 (0.54–2.11) |
| <b>Overdominant</b>           | P = 0.024        | P = 0.021        | P = 0.542        | P = 0.612        |
| A/A-a/a                       | 1 (Reference)    | 1 (Reference)    | 1 (Reference)    | 1 (Reference)    |
| A/a                           | 0.61 (0.39–0.94) | 0.60 (0.39–0.93) | 1.14 (0.74–1.76) | 1.12 (0.72–1.74) |
| <b>Additive</b>               | P = 0.649        | P = 0.602        | P = 0.602        | P = 0.707        |
| N <sup>2</sup> of “a” alleles | 0.93 (0.68–1.27) | 0.92 (0.66–1.27) | 1.08 (0.80–1.47) | 1.06 (0.77–1.46) |
| <b>Dominant</b>               | P = 0.146        | P = 0.125        | P = 0.500        | P = 0.601        |
| A/A                           | 1 (Reference)    | 1 (Reference)    | 1 (Reference)    | 1 (Reference)    |
| A/a-a/a                       | 0.73 (0.47–1.12) | 0.71 (0.46–1.10) | 1.16 (0.75–1.79) | 1.13 (0.72–1.77) |
| <b>Recessive</b>              | P = 0.227        | P = 0.229        | P = 0.924        | P = 0.991        |
| A/A-A/a                       | 1 (Reference)    | 1 (Reference)    | 1 (Reference)    | 1 (Reference)    |
| a/a                           | 1.47 (0.78–2.77) | 1.48 (0.78–2.82) | 1.03 (0.56–1.87) | 1.00 (0.53–1.87) |

\*“A” and “a” correspond to wild-type (i.e., either R72 or T309) and variant alleles (i.e., either P72 or G309), respectively.  
doi:10.1371/journal.pone.0089489.t002

homozygous genotype as the reference group (as described elsewhere [46]).

For the analyses of epistasis, a total of 13 epistatic models were tested using crude and adjusted logistic regression models. Eleven of them were described elsewhere [46]. Briefly, the following epistatic models were tested: dominant epistasis [both R72P over T309G (reference: R72R T309T; category 1: R72R G309\_; category 2: P72\_ \_309\_) and vice-versa (reference: R72R T309T;

category 1: P72\_ T309T; category 2: \_72\_ G309\_)], recessive epistasis [both R72P over T309G (reference: R72\_ T309\_; category 1: R72\_ G309G; category 2: P72P \_309) and vice-versa (reference: R72\_ T309\_; category 1: R72R T309\_; category 2: \_72\_ G309G)], dominant and recessive epistasis [both R72P over T309G (reference: remaining genotypic combinations; category 1: P72\_ G309G) and vice-versa (reference: remaining genotypic combinations; category 1: P72P G309\_)], double dominant

**Table 3.** Crude and adjusted associations [showing OR (95% CI) and p-values] between R72P and T309G SNPs and HPV oncogenic risk.

| Genetic model*                | R72P             |                  | T309G            |                  |
|-------------------------------|------------------|------------------|------------------|------------------|
|                               | Crude            | Adjusted         | Crude            | Adjusted         |
| <b>Codominant</b>             | P = 0.680        | P = 0.553        | P = 0.024        | P = 0.019        |
| A/A                           | 1 (Reference)    | 1 (Reference)    | 1 (Reference)    | 1 (Reference)    |
| A/a                           | 1.43 (0.65–3.21) | 1.54 (0.69–3.55) | 0.35 (0.15–0.78) | 0.32 (0.13–0.74) |
| a/a                           | 1.19 (0.40–3.85) | 1.48 (0.46–5.22) | 0.91 (0.28–3.27) | 0.81 (0.24–2.99) |
| <b>Overdominant</b>           | P = 0.410        | P = 0.381        | P = 0.006        | P = 0.005        |
| A/A-a/a                       | 1 (Reference)    | 1 (Reference)    | 1 (Reference)    | 1 (Reference)    |
| A/a                           | 1.37 (0.65–2.99) | 1.41 (0.66–3.09) | 0.36 (0.17–0.75) | 0.34 (0.16–0.73) |
| <b>Additive</b>               | P = 0.545        | P = 0.350        | P = 0.321        | P = 0.244        |
| N <sup>2</sup> of “a” alleles | 1.17 (0.70–2.01) | 1.30 (0.75–2.32) | 0.77 (0.45–1.30) | 0.73 (0.42–1.24) |
| <b>Dominant</b>               | P = 0.410        | P = 0.277        | P = 0.033        | P = 0.021        |
| A/A                           | 1 (Reference)    | 1 (Reference)    | 1 (Reference)    | 1 (Reference)    |
| A/a-a/a                       | 1.36 (0.65–2.84) | 1.53 (0.71–3.33) | 0.43 (0.19–0.94) | 0.40 (0.17–0.87) |
| <b>Recessive</b>              | P = 0.969        | P = 0.761        | P = 0.344        | P = 0.394        |
| A/A-A/a                       | 1 (Reference)    | 1 (Reference)    | 1 (Reference)    | 1 (Reference)    |
| a/a                           | 1.02 (0.36–3.16) | 1.19 (0.40–3.90) | 1.67 (0.59–5.49) | 1.60 (0.56–5.29) |

\*“A” and “a” correspond to wild-type (i.e., either R72 or T309) and variant alleles (i.e., either P72 or G309), respectively.  
doi:10.1371/journal.pone.0089489.t003

**Table 4.** Crude and adjusted associations [showing OR (95% CI) and p-values] between R72P and T309G SNPs and HIV status.

| Genetic model*                | R72P             |                  | T309G            |                  |
|-------------------------------|------------------|------------------|------------------|------------------|
|                               | Crude            | Adjusted         | Crude            | Adjusted         |
| <b>Codominant</b>             | P = 0.209        | P = 0.432        | P = 0.528        | P = 0.168        |
| A/A                           | 1 (Reference)    | 1 (Reference)    | 1 (Reference)    | 1 (Reference)    |
| A/a                           | 0.98 (0.59–1.63) | 0.90 (0.54–1.52) | 1.30 (0.79–2.17) | 1.60 (0.91–2.84) |
| a/a                           | 1.79 (0.88–3.61) | 1.45 (0.69–2.99) | 1.34 (0.66–2.65) | 1.85 (0.83–4.07) |
| <b>Overdominant</b>           | P = 0.476        | P = 0.405        | P = 0.431        | P = 0.254        |
| A/A-a/a                       | 1 (Reference)    | 1 (Reference)    | 1 (Reference)    | 1 (Reference)    |
| A/a                           | 0.84 (0.53–1.34) | 0.82 (0.51–1.31) | 1.21 (0.75–1.93) | 1.35 (0.81–2.25) |
| <b>Additive</b>               | P = 0.205        | P = 0.517        | P = 0.305        | P = 0.073        |
| N <sup>2</sup> of “a” alleles | 1.25 (0.89–1.75) | 1.12 (0.79–1.60) | 1.19 (0.86–1.64) | 1.41 (0.97–2.05) |
| <b>Dominant</b>               | P = 0.606        | P = 0.984        | P = 0.259        | P = 0.064        |
| A/A                           | 1 (Reference)    | 1 (Reference)    | 1 (Reference)    | 1 (Reference)    |
| A/a-a/a                       | 1.13 (0.71–1.83) | 1.00 (0.62–1.64) | 1.31 (0.82–2.11) | 1.65 (0.97–2.86) |
| <b>Recessive</b>              | P = 0.077        | P = 0.216        | P = 0.634        | P = 0.347        |
| A/A-A/a                       | 1 (Reference)    | 1 (Reference)    | 1 (Reference)    | 1 (Reference)    |
| a/a                           | 1.81 (0.94–3.45) | 1.53 (0.77–2.97) | 1.17 (0.60–2.19) | 1.42 (0.68–2.87) |

\*“A” and “a” correspond to wild-type (i.e., either R72 or T309) and variant alleles (i.e., either P72 or G309), respectively.  
doi:10.1371/journal.pone.0089489.t004

epistasis without cumulative effect (reference: R72R T309T; category 1: remaining genotypic combinations), double recessive epistasis without cumulative effect (reference: R72\_ T309\_; category 1: remaining genotypic combinations), double dominant epistasis with cumulative effect (reference: R72R T309T; category 1: remaining genotypic combinations; category 2: P72\_ G309\_), double recessive epistasis with cumulative effect (reference: R72\_ T309\_; category 1: remaining genotypic combinations; category 2: P72P G309G) and quantitative (number of P72 and G309 alleles). After testing these epistatic models, two additional ones were elaborated based on an exploratory visual inspection (plot obtained using the “plotrix” R package: <http://cran.r-project.org/web/packages/plotrix/index.html>) of the OR [and associated 95% confidence intervals (95% CI)] resulting from an adjusted logistic regression model of HIV status (dependent variable) on combined genotypes of R72P and T309G SNPs (independent variable). This visual method was described elsewhere [46] and is aimed at identifying patterns that may indicate an epistatic relationship not reflected in the other models. For the association analyses,  $P < 0.05$  was considered statistically significant and  $P < 0.10$  (but  $\geq 0.05$ ) was considered of marginal significance.

Given our limited sample size and the practical/logistic impossibility of increasing it, power analyses were performed to estimate the statistical power of this study for different OR values. These analyses were performed by simulations (see Methods S1 for details).

## Results

### Sample Description

The characteristics of the sample (stratified according to HIV infection status) are shown in table 1. There were statistically significant differences between HIV-positive and HIV-negative regarding the two HPV-related outcomes, age, schooling ( $P < 0.001$ ) and skin color ( $P = 0.005$ ). Family income did not significantly differ between HIV strata ( $P = 0.389$ ). In this initial analysis, no significant differences were observed between HIV

strata regarding the genotypic frequencies of R72P ( $P = 0.200$ ) and T309G ( $P = 0.543$ ) SNPs. Moreover, there was no evidence for departures from HWE regarding R72P and T309G SNPs in the total sample ( $P > 0.999$  and  $P = 0.102$ , respectively) and within skin color strata (white:  $P = 0.642$  and  $P = 0.474$ ; black:  $P > 0.999$  and  $P > 0.999$ ; brown:  $P = 0.797$  and  $P = 0.331$ ).

The observed differences are in the expected direction regarding HPV infection prevalence (70.4% in HIV-positive and 32.0% in HIV-negative women), age (prevalence of age groups: 18–24, 17.2% and 3.0%; 25–30, 22.0% and 10.0%; 31–35, 18.0% and 17.0%; 36–39, 20.0% and 17.0%; and 40–45, 22.8% and 5.3% in HIV-positive and HIV-negative groups, respectively), skin color (prevalence of skin color groups: white, 65.6% and 51.0%; black, 12.4% and 26.0%; and brown, 22.0% and 23.0% in HIV-positive and HIV-negative women, respectively) and achieved schooling in years (prevalence of schooling categories: illiterate, 1.6% and 0.0%; 1–4, 13.0% and 23.2%; 5–8, 37.8% and 45.3%; 9–10, 14.6% and 0.0%; and 11 or more, 32.9% and 31.6%, in HIV-positive and HIV-negative women, respectively). Although the genotypic frequencies of none of the SNPs significantly differed between HIV strata, the heterogeneity of these groups was considered relevant for the association analyses.

### Associations of R72P and T309G SNPs with HPV Outcomes and HIV Status

For R72P SNP, only skin color was considered a covariate for all outcomes. For T309G SNP, in addition to skin color, age was also considered a covariate for HPV status and HIV status (tables S1 and S2). Crude and adjusted analyses for the associations of R72P and T309G SNPs with the outcomes are shown in tables 2–4. For HPV status, no significant associations with T309G SNP were observed ( $P \geq 0.500$ ). Regarding R72P SNP, a marginal association was observed for the codominant model [crude (genotypes R72P and P72P, respectively): OR (95% CI), 0.63 (0.40–1.00) and 1.16 (0.59–2.28);  $P = 0.071$ ; adjusted: OR (95% CI), 0.62 (0.39–0.99) and 1.14 (0.57–2.28);  $P = 0.065$ ] and there

**Table 5.** Associations between 11 epistatic models and HPV status.

| Epistaticmodel*                                    | Genotypic combination               | Crude            |         | Adjusted          |         |
|----------------------------------------------------|-------------------------------------|------------------|---------|-------------------|---------|
|                                                    |                                     | OR (95% CI)      | P-value | OR (95% CI)       | P-value |
| Dominant (1.1)                                     | R72R T309T                          | 1 (Reference)    | 0.192   | 1 (Reference)     | 0.129   |
|                                                    | R72R G309 <sub>†</sub>              | 1.45 (0.74–2.87) |         | 1.44 (0.72–2.88)  |         |
|                                                    | P72 <sub>‡</sub> _309 <sub>‡</sub>  | 0.91 (0.50–1.67) |         | 0.83 (0.45–1.55)  |         |
| Dominant (1.2)                                     | R72R T309T                          | 1 (Reference)    | 0.778   | 1 (Reference)     | 0.815   |
|                                                    | P72 <sub>‡</sub> _T309T             | 0.93 (0.48–1.82) |         | 0.88 (0.44–1.76)  |         |
|                                                    | _72 <sub>‡</sub> _G309 <sub>‡</sub> | 1.11 (0.61–2.03) |         | 1.04 (0.57–1.93)  |         |
| Recessive (2.1)                                    | R72 <sub>‡</sub> _T309 <sub>‡</sub> | 1 (Reference)    | 0.479   | 1 (Reference)     | 0.378   |
|                                                    | R72 <sub>‡</sub> _G309G             | 1.03 (0.53–1.96) |         | 0.96 (0.49–1.88)  |         |
|                                                    | P72P <sub>‡</sub> _309 <sub>‡</sub> | 1.48 (0.78–2.80) |         | 1.58 (0.82–3.07)  |         |
| Recessive(2.2)                                     | R72 <sub>‡</sub> _T309 <sub>‡</sub> | 1 (Reference)    | 0.533   | 1 (Reference)     | 0.494   |
|                                                    | R72R T309 <sub>‡</sub>              | 1.47 (0.74–2.90) |         | 1.53 (0.76–3.07)  |         |
|                                                    | _72 <sub>‡</sub> _G309G             | 1.08 (0.58–1.99) |         | 1.05 (0.55–1.97)  |         |
| Dominantand<br>recessive (3.1)                     | Other <sup>‡</sup>                  | 1 (Reference)    | 0.482   | 1 (Reference)     | 0.479   |
| Dominantand<br>recessive (3.2)                     | P72 <sub>‡</sub> _G309G             | 0.75 (0.33–1.64) |         | 0.75 (0.32–1.66)  |         |
| Double dominant(no<br>effect accumulation) (4)     | R72R T309T                          | 1 (Reference)    | 0.876   | 1 (Reference)     | 0.966   |
|                                                    | Other                               | 1.05 (0.59–1.88) |         | 0.99 (0.55–1.79)  |         |
| Double recessive (no<br>effect accumulation) (5)   | R72 <sub>‡</sub> _T309 <sub>‡</sub> | 1 (Reference)    | 0.387   | 1 (Reference)     | 0.395   |
|                                                    | Other                               | 1.24 (0.76–2.01) |         | 1.24 (0.75–2.03)  |         |
| Double dominant(with<br>effect accumulation) (6)   | R72R T309T                          | 1 (Reference)    | 0.574   | 1 (Reference)     | 0.433   |
|                                                    | Other                               | 1.15 (0.63–2.12) |         | 1.11 (0.61–2.08)  |         |
|                                                    | P72 <sub>‡</sub> _G309 <sub>‡</sub> | 0.89 (0.47–1.72) |         | 0.80 (0.41–1.57)  |         |
| Double recessive (with<br>effect accumulation) (7) | R72 <sub>‡</sub> _T309 <sub>‡</sub> | 1 (Reference)    | 0.661   | 1 (Reference)     | 0.602   |
|                                                    | Other                               | 1.22 (0.74–2.00) |         | 1.20 (0.72–2.00)  |         |
|                                                    | P72P <sub>‡</sub> _G309G            | 1.55 (0.28–8.51) |         | 1.92 (0.34–11.01) |         |
| Quantitative (8)                                   | N° of P72 and<br>G309 alleles       | 1.01 (0.81–1.26) | 0.950   | 0.98 (0.78–1.24)  | 0.893   |

\*The epistatic models were numbered as described previously [46].

<sup>†</sup>The “\_” indicates that the effect is irrespective of the allele. E.g., R72P G309<sub>‡</sub> represents the genotypic combinations R72P T309G - R72P G309G.

<sup>‡</sup>Other: **3.1:** R72<sub>‡</sub>\_T309<sub>‡</sub> - R72R\_309<sub>‡</sub>; **3.2:** R72<sub>‡</sub>\_309<sub>‡</sub> - \_72<sub>‡</sub>\_T309T; **4:** P72<sub>‡</sub>\_309<sub>‡</sub> - \_72<sub>‡</sub>\_G309<sub>‡</sub>; **5:** P72P<sub>‡</sub>\_309<sub>‡</sub> - \_72<sub>‡</sub>\_G309G; **6:** R72R G309<sub>‡</sub> - P72<sub>‡</sub>\_T309T; **7:** P72P<sub>‡</sub>\_T309<sub>‡</sub> - R72<sub>‡</sub>\_G309G.

doi:10.1371/journal.pone.0089489.t005

was a significant association for the overdominant model [crude: OR (95% CI), 0.61 (0.39–0.94); P = 0.024; adjusted: OR (95% CI), 0.60 (0.39–0.93); P = 0.021]. Indeed, the OR patterns observed for the codominant model indicate a protective overdominant effect.

For HPV oncogenic risk, the results were somehow opposite. No significant associations were observed for R72P SNP (P ≥ 0.277). Regarding T309G SNP, significant associations were observed for codominant [crude (genotypes T309G and G309G, respectively): OR (95% CI), 0.35 (0.15–0.78) and 0.91 (0.28–3.27); P = 0.024; adjusted: OR (95% CI), 0.32 (0.13–0.74) and 0.81 (0.24–2.99); P = 0.019], overdominant [crude: OR (95% CI), 0.36 (0.17–0.75); P = 0.006; adjusted: OR (95% CI), 0.34 (0.16–0.73); P = 0.005] and dominant [crude: OR (95% CI), 0.43 (0.19–0.94); P = 0.033; adjusted; OR (95% CI), 0.40 (0.17–0.87); P = 0.021] models. Again, the codominant model already indicated a protective overdominant effect.

In contrast to HPV outcomes, only marginal associations were observed for HIV status. There were neither significant nor

marginal associations for R72P SNP (P ≥ 0.205). Regarding T309G SNP, marginal associations were observed for additive [crude: OR (95% CI), 1.19 (0.86–1.64); P = 0.305; adjusted: OR (95% CI), 1.41 (0.97–2.05); P = 0.073] and dominant [crude: OR (95% CI), 1.31 (0.82–2.11); P = 0.259; adjusted: OR (95% CI), 1.65 (0.97–2.86); P = 0.064] models. Although marginal, these associations lead to the speculation that HIV status could be an (at least partial) effect mediator of the associations between T309G SNP and HPV oncogenic risk. In this regard, the analysis of association between this SNP and HPV oncogenic risk were repeated with the inclusion of HIV status as a covariate (table S3). By doing so, only the overdominant model remained, although attenuated, statistically significant [OR (95% CI), 0.38 (0.14–0.96); P = 0.040]. The same was performed for the analysis of association between R72P SNP and HPV status, but no substantial differences were observed [overdominant model: OR (95% CI), 0.60 (0.38–0.96); P = 0.032], further evidencing an effect mediation role in HIV status in the associations between T309G SNP and HPV oncogenic risk.

**Table 6.** Associations between 11 epistatic models and HPV oncogenic risk.

| Epistatic model <sup>a</sup>                    | Genotypic Combination                  | Crude             |         | Adjusted          |         |
|-------------------------------------------------|----------------------------------------|-------------------|---------|-------------------|---------|
|                                                 |                                        | OR (95% CI)       | P-value | OR (95% CI)       | P-value |
| Dominant (1.1)                                  | R72R T309T                             | 1 (Reference)     | 0.038   | 1 (Reference)     | 0.024   |
|                                                 | R72P G309 <sub>-</sub> <sup>†</sup>    | 0.24 (0.06–0.77)  |         | 0.22 (0.06–0.73)  |         |
|                                                 | P72 <sub>-</sub> T309 <sub>-</sub>     | 0.49 (0.13–1.53)  |         | 0.54 (0.14–1.72)  |         |
| Dominant (1.2)                                  | R72R T309T                             | 1 (Reference)     | 0.077   | 1 (Reference)     | 0.060   |
|                                                 | P72 <sub>-</sub> T309T                 | 0.59 (0.14–2.22)  |         | 0.67 (0.15–2.63)  |         |
|                                                 | R72 <sub>-</sub> G309 <sub>-</sub>     | 0.31 (0.08–0.94)  |         | 0.31 (0.08–0.94)  |         |
| Recessive (2.1)                                 | R72 <sub>-</sub> T309 <sub>-</sub>     | 1 (Reference)     | 0.608   | 1 (Reference)     | 0.649   |
|                                                 | R72 <sub>-</sub> G309G                 | 1.81 (0.58–6.87)  |         | 1.70 (0.54–6.50)  |         |
|                                                 | P72P T309 <sub>-</sub>                 | 1.11 (0.39–3.46)  |         | 1.25 (0.42–4.11)  |         |
| Recessive(2.2)                                  | R72 <sub>-</sub> T309 <sub>-</sub>     | 1 (Reference)     | 0.633   | 1 (Reference)     | 0.656   |
|                                                 | R72R T309 <sub>-</sub>                 | 1.09 (0.35–3.78)  |         | 1.24 (0.38–4.53)  |         |
|                                                 | R72 <sub>-</sub> G309G                 | 1.69 (0.59–5.59)  |         | 1.63 (0.57–5.43)  |         |
| Dominant and recessive (3.1)                    | Other <sup>‡</sup>                     | 1 (Reference)     | 0.082   | 1 (Reference)     | 0.086   |
| Dominant and recessive (3.2)                    | P72PG309 <sub>-</sub>                  | 4.82 (0.84–90.98) |         | 4.75 (0.83–89.77) |         |
| Dominant and recessive (3.2)                    | Other                                  | 1 (Reference)     | 0.876   | 1 (Reference)     | 0.768   |
| Double dominant (no effect accumulation) (4)    | P72PG309 <sub>-</sub>                  | 1.12 (0.28–5.52)  |         | 1.24 (0.30–6.27)  |         |
| Double dominant (with effect accumulation) (6)  | R72R T309T                             | 1 (Reference)     | 0.069   | 1 (Reference)     | 0.074   |
|                                                 | Other                                  | 0.37 (0.10–1.08)  |         | 0.37 (0.10–1.10)  |         |
| Double recessive (no effect accumulation) (5)   | R72 <sub>-</sub> T309 <sub>-</sub>     | 1 (Reference)     | 0.446   | 1 (Reference)     | 0.396   |
|                                                 | Other                                  | 1.39 (0.60–3.37)  |         | 1.45 (0.62–3.54)  |         |
| Double dominant (with effect accumulation) (6)  | R72R T309T                             | 1 (Reference)     | 0.159   | 1 (Reference)     | 0.165   |
|                                                 | Other                                  | 0.34 (0.09–1.02)  |         | 0.34 (0.09–1.04)  |         |
|                                                 | P72 <sub>-</sub> G309 <sub>-</sub>     | 0.43 (0.11–1.47)  |         | 0.44 (0.11–1.52)  |         |
| Double recessive (with effect accumulation) (7) | R72 <sub>-</sub> T309 <sub>-</sub>     | 1 (Reference)     | 0.743   | 1 (Reference)     | 0.697   |
|                                                 | Other                                  | 1.41 (0.59–3.55)  |         | 1.45 (0.61–3.70)  |         |
|                                                 | P72P G309G                             | 1.21 (0.11–26.53) |         | 1.36 (0.12–30.58) |         |
| Quantitative (8)                                | N <sup>§</sup> of P72 and G309 alleles | 0.95 (0.65–1.39)  | 0.781   | 0.96 (0.66–1.42)  | 0.854   |

<sup>a</sup>The epistatic models were numbered as described previously [46].

<sup>†</sup>The “<sub>-</sub>” indicates that the effect is irrespective of the allele. E.g., R72P G309<sub>-</sub> represents the genotypic combinations R72P T309G - R72P G309G.

<sup>‡</sup>Other: **3.1:** R72<sub>-</sub> T309<sub>-</sub> - R72R T309<sub>-</sub>; **3.2:** R72<sub>-</sub> T309<sub>-</sub> - R72<sub>-</sub> T309T; **4:** P72<sub>-</sub> T309<sub>-</sub> - R72<sub>-</sub> G309<sub>-</sub>; **5:** P72P T309<sub>-</sub> - R72<sub>-</sub> G309G; **6:** R72R G309<sub>-</sub> - P72<sub>-</sub> T309T; **7:** P72P T309<sub>-</sub> - R72<sub>-</sub> G309G.

doi:10.1371/journal.pone.0089489.t006

### Epistatic Models Were Associated with HPV Oncogenic Risk and HIV Status

In addition to skin color, age was considered a covariate for HPV status and HIV status (table S4). Crude and adjusted analyses for the associations of epistatic models and study outcomes are shown in tables 5–7. No associations were observed for HPV status ( $P \geq 0.192$  and  $P \geq 0.129$ , respectively). Regarding HPV oncogenic risk, a significant association was observed for dominant epistasis with R72P SNP overcoming the effects of T309G SNP [model 1.1 (genotypic combinations R72P G309<sub>-</sub> and R72<sub>-</sub> T309<sub>-</sub>, respectively); crude: OR (95% CI), 0.24 (0.06–0.77) and 0.49 (0.13–1.53);  $P = 0.038$ ; adjusted: OR (95% CI), 0.22 (0.06–0.73) and 0.54 (0.14–1.72);  $P = 0.024$ ]. In addition, marginal associations were observed for dominant epistasis with T309G SNP overcoming the effects of R72P SNP [model 1.2 (genotypic combinations P72 T309T and R72<sub>-</sub> G309<sub>-</sub>, respectively); crude: OR (95% CI), 0.59 (0.14–2.22) and 0.31 (0.08–0.94);  $P = 0.077$ ; adjusted: OR (95% CI), 0.67 (0.15–2.63) and 0.31 (0.08–0.94);

$P = 0.060$ ], dominant and recessive epistasis with R72P having a dominant effect given that G309G occurs [model 3.1; crude: OR (95% CI), 4.82 (0.84–90.98);  $P = 0.082$ ; adjusted: OR (95% CI), 4.75 (0.83–89.77);  $P = 0.086$ ] and double dominant epistasis without cumulative effect [model 4; crude: OR (95% CI), 0.37 (0.10–1.08);  $P = 0.069$ ; adjusted: OR (95% CI), 0.37 (0.10–1.10);  $P = 0.074$ ]. For the other models, no associations were observed ( $P \geq 0.159$ ).

The most significant associations involving models of epistasis were observed for HIV status. The strongest ones were observed for models of dominant epistasis with R72P SNP overcoming the effects of T309G SNP [model 1.1 (genotypic combinations R72P G309<sub>-</sub> and R72<sub>-</sub> T309<sub>-</sub>, respectively); crude: OR (95% CI), 3.52 (1.54–8.88) and 2.63 (1.23–6.29);  $P = 0.009$ ; adjusted: OR (95% CI), 4.34 (1.79–11.57) and 2.45 (1.09–6.10);  $P = 0.004$ ] and double dominant epistasis without cumulative effects (model 4; crude: OR (95% CI), 2.88 (1.38–6.78);  $P = 0.004$ ; adjusted: OR (95% CI), 2.90 (1.33–7.08);  $P = 0.006$ ). There were significant associations also for dominant epistasis with T309G SNP overcoming the

**Table 7.** Associations between 11 epistatic models and HIV status.

| Epistatic model <sup>a</sup>                    | Genotypic combination               | Crude            |         | Adjusted          |         |
|-------------------------------------------------|-------------------------------------|------------------|---------|-------------------|---------|
|                                                 |                                     | OR (95% CI)      | P-value | OR (95% CI)       | P-value |
| Dominant (1.1)                                  | R72R T309T                          | 1 (Reference)    | 0.009   | 1 (Reference)     | 0.004   |
|                                                 | R72P G309 <sub>-</sub> <sup>†</sup> | 3.52 (1.54–8.88) |         | 4.34 (1.79–11.57) |         |
|                                                 | P72 <sub>-</sub> G309 <sub>-</sub>  | 2.63 (1.23–6.29) |         | 2.45 (1.09–6.10)  |         |
| Dominant (1.2)                                  | R72R T309T                          | 1 (Reference)    | 0.015   | 1 (Reference)     | 0.020   |
|                                                 | P72 <sub>-</sub> T309T              | 3.03 (1.33–7.59) |         | 2.57 (1.06–6.78)  |         |
|                                                 | _72 <sub>-</sub> G309 <sub>-</sub>  | 2.80 (1.32–6.71) |         | 3.09 (1.38–7.72)  |         |
| Recessive (2.1)                                 | R72 <sub>-</sub> T309 <sub>-</sub>  | 1 (Reference)    | 0.166   | 1 (Reference)     | 0.139   |
|                                                 | R72 <sub>-</sub> G309G              | 1.28 (0.62–2.50) |         | 1.46 (0.67–3.10)  |         |
|                                                 | P72P G309 <sub>-</sub>              | 1.88 (0.96–3.61) |         | 2.01 (0.95–4.20)  |         |
| Recessive(2.2)                                  | R72 <sub>-</sub> T309 <sub>-</sub>  | 1 (Reference)    | 0.156   | 1 (Reference)     | 0.151   |
|                                                 | R72R T309 <sub>-</sub>              | 1.96 (0.97–3.92) |         | 1.97 (0.90–4.25)  |         |
|                                                 | _72 <sub>-</sub> G309G              | 1.29 (0.66–2.45) |         | 1.53 (0.73–3.14)  |         |
| Dominant and recessive (3.1)                    | Other <sup>‡</sup>                  | 1 (Reference)    | 0.140   | 1 (Reference)     | 0.420   |
| Dominant and recessive (3.2)                    | P72PG309 <sub>-</sub>               | 0.50 (0.16–1.24) |         | 0.65 (0.20–1.79)  |         |
| Double dominant (no effect accumulation) (4)    | R72R T309T                          | 1 (Reference)    | 0.004   | 1 (Reference)     | 0.006   |
|                                                 | Other                               | 2.88 (1.38–6.78) |         | 2.90 (1.33–7.08)  |         |
| Double recessive (no effect accumulation) (5)   | R72 <sub>-</sub> T309 <sub>-</sub>  | 1 (Reference)    | 0.093   | 1 (Reference)     | 0.060   |
|                                                 | Other                               | 1.56 (0.93–2.59) |         | 1.72 (0.98–3.02)  |         |
| Double dominant (with effect accumulation) (6)  | R72R T309T                          | 1 (Reference)    | 0.007   | 1 (Reference)     | 0.011   |
|                                                 | Other                               | 3.26 (1.52–7.81) |         | 3.29 (1.47–8.20)  |         |
|                                                 | P72 <sub>-</sub> G309 <sub>-</sub>  | 2.31 (1.02–5.78) |         | 2.32 (0.97–6.04)  |         |
| Double recessive (with effect accumulation) (7) | R72 <sub>-</sub> T309 <sub>-</sub>  | 1 (Reference)    | 0.243   | 1 (Reference)     | 0.164   |
|                                                 | Other                               | 1.57 (0.92–2.64) |         | 1.69 (0.95–3.00)  |         |
|                                                 | P72P G309G                          | 1.41 (0.19–7.40) |         | 2.29 (0.25–15.36) |         |
| Quantitative (8)                                | N° of P72 and G309 alleles          | 1.23 (0.96–1.56) | 0.098   | 1.28 (0.98–1.67)  | 0.074   |

<sup>a</sup>The epistatic models were numbered as described previously [46].

<sup>†</sup>The “<sub>-</sub>” indicates that the effect is irrespective of the allele. E.g., R72P G309<sub>-</sub> represents the genotypic combinations R72P T309G - R72P G309G.

<sup>‡</sup>Other: **3.1:** \_72<sub>-</sub> T309<sub>-</sub> - R72R \_309<sub>-</sub>. **3.2:** R72<sub>-</sub> \_309<sub>-</sub> - \_72<sub>-</sub> T309T. **4:** P72<sub>-</sub> \_309<sub>-</sub> - \_72<sub>-</sub> G309<sub>-</sub>. **5:** P72P \_309<sub>-</sub> - \_72<sub>-</sub> G309G. **6:** R72R G309<sub>-</sub> - P72<sub>-</sub> T309T. **7:** P72P T309<sub>-</sub> - R72<sub>-</sub> G309G.

doi:10.1371/journal.pone.0089489.t007

effects of R72P SNP [model 1.2 (genotypic combinations P72 T309T and \_72<sub>-</sub> G309<sub>-</sub>, respectively); crude: OR (95% CI), 3.03 (1.33–7.59) and 2.80 (1.32–6.71); P = 0.015; adjusted: OR (95% CI), 2.57 (1.06–6.78) and 3.09 (1.38–7.72); P = 0.020] and double dominant epistasis with cumulative effect [model 7 (genotypic combinations P72P T309<sub>-</sub> - R72<sub>-</sub> G309G and P72P G309G, respectively); crude: OR (95% CI), 3.26 (1.52–7.81) and 2.31 (1.02–5.78); P = 0.007; adjusted: OR (95% CI), 3.29 (1.47–8.20) and 2.32 (0.97–6.04); P = 0.011]. Marginal associations were observed for double recessive epistasis without cumulative effects [model 5; crude: OR (95% CI), 1.56 (0.93–2.59); P = 0.093; adjusted: OR (95% CI), 1.72 (0.98–3.02); P = 0.060] and quantitative [model 8; crude: OR (95% CI), 1.23 (0.96–1.56); P = 0.098; adjusted: OR (95% CI), 1.28 (0.98–1.67); P = 0.074] models. Since statistically significant associations of different epistatic models with HPV oncogenic risk and HIV status were observed, the adjusted analyses for the first were repeated, including HIV status as a covariate (table S5). The significant

associations were not maintained (P ≥ 0.142), thus suggesting a mediation effect of HIV status.

Since there were significant associations of different epistatic models with HIV status, a visual inspection of OR (with 95% CI) resulting from the adjusted analyses between genotypic combinations of the two SNPs and HIV was performed to identify patterns and, possibly, elaborate further epistatic models. Larger (and similar to one another) OR values were observed for the genotypic combinations R72R G309G and P72PT309T than for the rest (figure 1). This pattern indicates that a different epistatic effect may be underlying the observed associations. Therefore, an additional model was elaborated to reflect the following epistatic relationship: a double dominant effect that both affects disease risk and blocks a “hidden” additional recessive effect, which is manifested in the presence of a homozygous-wild homozygous-variant genotypic combination (which could be called double dominant epistasis with blocked recessive effects). Such model was tested in categorical [assuming distinct effects for the following genotypic combinations: R72R T309T (reference); R72P \_309G<sub>-</sub>, \_72<sub>-</sub>



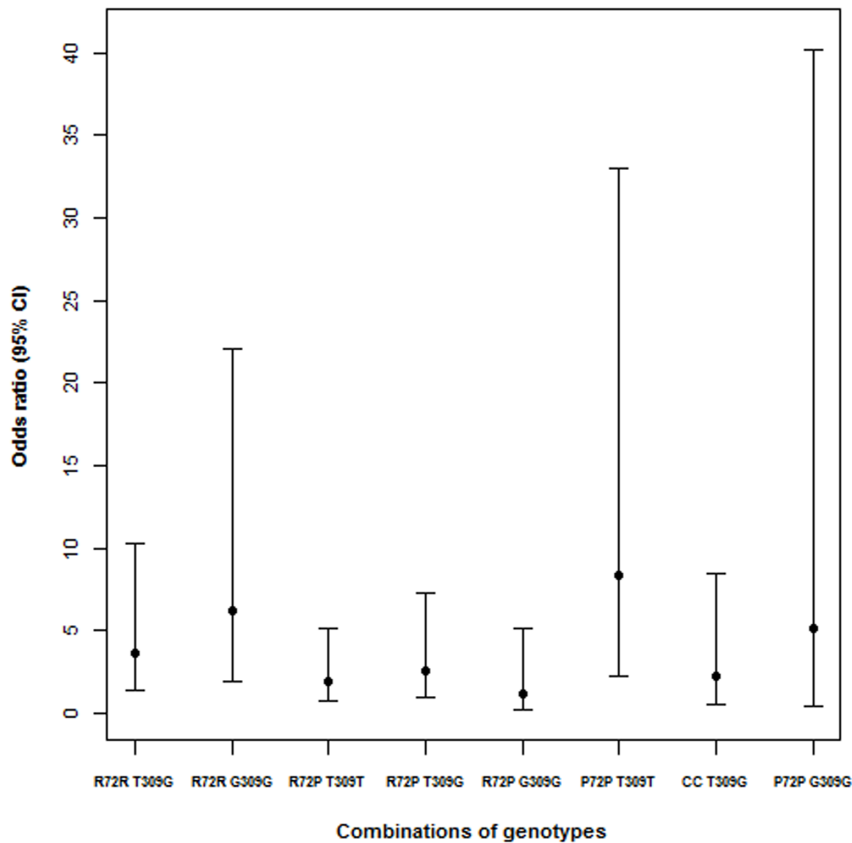

**Figure 1. OR (with 95% CI) for the association (adjusted for skin color and age) between combined genotypes of the two SNPs and HIV status.**

doi:10.1371/journal.pone.0089489.g001

T309G and P72P G309G; and R72R G309G and P72P T309T] and in numeric (i.e., linear tendency) forms, hereafter referred to as models 9.1 and 9.2, respectively. Even stronger associations than the previous ones were observed for models 9.1 [genotypic combinations R72P\_T309G - P72P G309G and R72R G309G - P72P T309T, respectively; crude: OR (95% CI), 2.43 (1.15-5.77) and 6.87 (2.72-18.91);  $P < 0.001$ ; adjusted: OR (95% CI), 2.47 (1.12-6.06) and 7.08 (2.59-21.01);  $P = 0.001$ ] and 9.2 (crude: OR (95% CI), 2.66 (1.67-4.35);  $P < 0.001$ ; adjusted: OR (95% CI), 2.68 (1.62-4.60);  $P < 0.001$ ).

## Discussion

We investigated, for the first time in the epidemiological setting, the evidence linking p53 and MDM2 with HIV, as well as potential implications of SNPs in the p53 pathway for HPV-related outcomes others than cancer development and/or progression. Analyses of epistatic models provided evidence for a novel mechanism linking the p53 pathway with HIV infection status. Interestingly, we observed large effect sizes for the epistatic models (achieving notably low  $P$ -values in a relatively small sample). This contrasts with a recent GWAS involving 6300 cases and 7200 controls that tested approximately 8 million common variants, which suggested that host genetic influences on HIV acquisition are either rare or have very small effects (not detectable given the study power) [20]. In our study, all genotypic combinations of the epistatic model 9.1 had a relatively high prevalence [R72R T309T: 50 (20.0%); R72R G309G - P72P T309T: 20 (8.0%) and the remaining genotypic combinations: 180 (72.0%) in

HIV-positive and R72R T309T: 8 (8.0%); R72R G309G - P72P T309T: 22 (22.0%) and the remaining genotypic combinations: 70 (70.0%) in HIV-negative women] and large effect sizes (OR, others: 2.47; R72R G309G - P72P T309T: 7.08). Indeed, when comparing our findings with the cited GWAS studies on HIV acquisition [15,20], our effect sizes are larger than all of the OR of statistically-significant SNPs reported in these studies, with one exception (OR, 9.51) that was observed in an exploratory phase of the analyses but was markedly decreased in the expanded and external validation analyses (2.67 and 1.69, respectively) [18]. This observation reinforces the importance of analyzing epistasis even in genome-wide scale studies [47,48].

An important consideration is that we found relatively weak associations of epistatic models with HPV-related outcomes (especially for HPV status), which would not be expected given their strong associations with HIV status. While very strong associations were found between some epistatic models and HIV status, there were no associations of models 9.1 and 9.2 with HPV status and HPV oncogenic risk (data not shown). It is conceptually difficult to conceive a factor causally involved in HIV status but not with HPV status when this is not adjusted for in the analysis (unless HIV status does not have a causal effect on HPV status). However, this issue does not invalidate our findings, since they are unlikely to be caused by confounding (discussed below) or chance alone (the  $P$ -values for models 9.1 and 9.2 were very low).

An important limitation of our study was the sample size (which increase was not possible due to practical/logistic reasons). Power analyses showed that, as expected, there was generally low power (power  $< 0.80$ ) when HPV oncogenic risk was the dependent

variable (power <0.80) for single-SNP and epistasis analyses (due to reduced sample size) alike. For the former (table S6), associations involving  $OR < 2$  and performed under the recessive model (of which the exposure prevalence is smaller than of other genetic effects) were also generally underpowered. For the latter (table S7), power was also reduced for associations involving  $OR < 3$  and for several models when HIV status was the dependent variable. These results, in addition to the partial redundancy of some genetic/epistatic models, are reflected in the several marginal associations observed. Although these observations illustrate that our analyses were underpowered under some circumstances, they support the causality of our associations, since the effect sizes were large enough to achieve statistical significance even in a small sample. This is particularly illustrated in the epistatic model 9.1: while power analyses indicate low power when HIV status was the dependent variable, very strong associations were observed due to the large OR values.

Another important consideration is that the study design was not optimal for causal inference. This is particularly relevant considering the hypothesis that the SNPs (in combination) might influence virus establishment/persistence after exposure to it, which would be a rather dynamic mechanism. However, it is well-known that associations involving germ-line genetic markers as independent variables are not subjected to reverse causation and are generally robust against confounding, as reviewed in the context of Mendelian randomization [49]. To further reduce the possibility of residual confounding caused by population stratification, the analyses were adjusted for skin color and additional covariates. Nonetheless, the optimal design would be a prospective study to validate our findings and understand their underlying mechanisms. Besides, the results for models 9.1 and 9.2 were very similar, thus requiring additional studies for validating not only the associations, but also the actual model epistatic model. Another issue is the true relationship among genetic markers and the study outcomes: it cannot be determined from our study whether the SNPs are truly causal or are in linkage disequilibrium with the causal variants. Nevertheless, the value of our findings regarding genetic predisposition to HIV persistence after viral exposure is independent of this issue. In summary, our results provided evidence for a role of the p53 pathway – involving R72P and T309G SNPs – in HPV status and HPV oncogenic risk, and strong associations were found for an epistatic effect on HIV status. Our results require validation in prospective cohort studies using larger samples for the associations and to identify the best epistatic model. Applications of our findings are related to genetic testing for HIV susceptibility and contributing to the understanding of HIV susceptibility differences among populations. Furthermore, findings of this nature can be explored in laboratory studies aiming at either elucidating HIV pathogenesis or developing new therapeutic/preventive strategies.

## Supporting Information

### Table S1 Likelihood-ratio chi-squared tests P-values of the selection of confounders based on association with

## References

1. Duncan SR, Scott S, Duncan CJ (2005) Reappraisal of the historical selective pressures for the CCR5-Delta32 mutation. *J Med Genet* 42: 205–208.
2. Steinberger P, Andris-Widhopf J, Buhler B, Torbett BE, Barbas CF 3rd (2000) Functional deletion of the CCR5 receptor by intracellular immunization produces cells that are refractory to CCR5-dependent HIV-1 infection and cell fusion. *Proc Natl Acad Sci U S A* 97: 805–810.
3. Allers K, Hutter G, Hofmann J, Loddenkemper C, Rieger K, et al. (2011) Evidence for the cure of HIV infection by CCR5Delta32/Delta32 stem cell transplantation. *Blood* 117: 2791–2799.

**each outcome.** \*Skin color was included as a covariate regardless of meeting the selection criteria.

(DOCX)

**Table S2 Likelihood-ratio chi-squared tests P-values of the selection of confounders based on association with each SNP.** \*Skin color was included as a covariate regardless of meeting the selection criteria. †Also associated with HPV and HIV status.

(DOCX)

**Table S3 Adjusted associations [showing OR (95% CI) and P-values], including HIV status as a covariate, between R72P SNP and HPV status and between T309G SNP and HPV oncogenic risk.** \*‘‘A’’ and ‘‘a’’ correspond to wild-type (i.e., either R72 or T309) and variant alleles (i.e., either P72 or G309), respectively.

(DOCX)

**Table S4 Likelihood-ratio chi-squared tests P-values of the selection of confounders based on association with combined genotypes.** \*Skin color was included as a covariate regardless of meeting the selection criteria. †Also associated with HPV and HIV status.

(DOCX)

**Table S5 Adjusted associations (including HIV status as a covariate) between 11 epistatic models and HPV oncogenic risk.** \*The epistatic models were numbered as described previously [46]. †The ‘‘\_’’ indicates that the effect is irrespective of the allele. E.g., R72P G309\_ represents the genotypic combinations R72P T309G - R72P G309G. ‡Other: **3.1:** \_72\_ T309\_ - R72R\_309\_ **3.2:** R72\_309\_ - \_72\_ T309T. **4:** P72\_309\_ - \_72\_ G309\_ **5:** P72P\_309\_ - \_72\_ G309G. **6:** R72R G309\_ - P72\_ T309T. **7:** P72P T309\_ - R72\_ G309G.

(DOCX)

**Table S6 Statistical power of the single-SNP analyses for different OR values.** \*The OR values of 1.25, 1.5, 2.0 and 3.0 correspond to 0.80, 0.67, 0.50 and 0.33, respectively.

(DOCX)

**Table S7 Statistical power of the epistasis analyses for different OR values.** \*The OR values of 1.25, 1.5, 2.0 and 3.0 correspond to 0.80, 0.67, 0.50 and 0.33, respectively.

(DOCX)

## Methods S1 Power Analysis.

(DOCX)

## Author Contributions

Conceived and designed the experiments: LGE TC FKS MFS. Performed the experiments: LGE EMN FMR. Analyzed the data: FPH. Contributed reagents/materials/analysis tools: TC FKS MFS. Wrote the paper: FPH.

7. Le Clerc S, Limou S, Coulonges C, Carpentier W, Dina C, et al. (2009) Genomewide association study of a rapid progression cohort identifies new susceptibility alleles for AIDS (ANRS Genomewide Association Study 03). *J Infect Dis* 200: 1194–1201.
8. Limou S, Le Clerc S, Coulonges C, Carpentier W, Dina C, et al. (2009) Genomewide association study of an AIDS-nonprogression cohort emphasizes the role played by HLA genes (ANRS Genomewide Association Study 02). *J Infect Dis* 199: 419–426.
9. Herbeck JT, Gottlieb GS, Winkler CA, Nelson GW, An P, et al. (2010) Multistage genomewide association study identifies a locus at 1q41 associated with rate of HIV-1 disease progression to clinical AIDS. *J Infect Dis* 201: 618–626.
10. Pelak K, Goldstein DB, Walley NM, Fellay J, Ge D, et al. (2010) Host determinants of HIV-1 control in African Americans. *J Infect Dis* 201: 1141–1149.
11. Pereyra F, Jia X, McLaren PJ, Telenti A, de Bakker PI, et al. (2010) The major genetic determinants of HIV-1 control affect HLA class I peptide presentation. *Science* 330: 1551–1557.
12. Le Clerc S, Coulonges C, Delaneau O, Van Manen D, Herbeck JT, et al. (2011) Screening low-frequency SNPs from genome-wide association study reveals a new risk allele for progression to AIDS. *J Acquir Immune Defic Syndr* 56: 279–284.
13. van Manen D, Delaneau O, Kootstra NA, Boeser-Nunnink BD, Limou S, et al. (2011) Genome-wide association scan in HIV-1-infected individuals identifying variants influencing disease course. *PLoS One* 6: e22208.
14. McLaren PJ, Ripke S, Pelak K, Weintrob AC, Patsopoulos NA, et al. (2012) Fine-mapping classical HLA variation associated with durable host control of HIV-1 infection in African Americans. *Hum Mol Genet* 21: 4334–4347.
15. Joubert BR, Lange EM, Franceschini N, Mwapasa V, North KE, et al. (2010) A whole genome association study of mother-to-child transmission of HIV in Malawi. *Genome Med* 2: 17.
16. Lingappa JR, Petrovski S, Kahle E, Fellay J, Shianna K, et al. (2011) Genomewide association study for determinants of HIV-1 acquisition and viral set point in HIV-1 serodiscordant couples with quantified virus exposure. *PLoS One* 6: e28632.
17. Petrovski S, Fellay J, Shianna KV, Carpenetti N, Kumwenda J, et al. (2011) Common human genetic variants and HIV-1 susceptibility: a genome-wide survey in a homogeneous African population. *AIDS* 25: 513–518.
18. Luo M, Sainsbury J, Tuff J, Lacap PA, Yuan XY, et al. (2012) A genetic polymorphism of *FREMI1* is associated with resistance against HIV infection in the Pumwani sex worker cohort. *J Virol* 86: 11899–11905.
19. Lane J, McLaren PJ, Dorrell L, Shianna KV, Stemke A, et al. (2013) A genome-wide association study of resistance to HIV infection in highly exposed uninfected individuals with hemophilia A. *Hum Mol Genet* 22: 1903–1910.
20. McLaren PJ, Coulonges C, Ripke S, van den Berg L, Buchbinder S, et al. (2013) Association Study of Common Genetic Variants and HIV-1 Acquisition in 6,300 Infected Cases and 7,200 Controls. *PLoS Pathog* 9: e1003515.
21. Doorbar J, Quint W, Banks L, Bravo IG, Stoler M, et al. (2012) The biology and life-cycle of human papillomaviruses. *Vaccine* 30 Suppl 5: F55–70.
22. Habbous S, Pang V, Eng L, Xu W, Kurtz G, et al. (2012) p53 Arg72Pro polymorphism, HPV status and initiation, progression, and development of cervical cancer: a systematic review and meta-analysis. *Clin Cancer Res* 18: 6407–6415.
23. Chansaenroj J, Theamboonlers A, Junyangdikul P, Swangvaree S, Karalak A, et al. (2013) Polymorphisms in TP53 (rs1042522), p16 (rs11515 and rs3088440) and NQO1 (rs1800566) genes in Thai cervical cancer patients with HPV 16 infection. *Asian Pac J Cancer Prev* 14: 341–346.
24. Alsbeih G, Al-Harbi N, El-Sebaie M, Al-Badawi I (2013) HPV prevalence and genetic predisposition to cervical cancer in Saudi Arabia. *Infect Agent Cancer* 8: 15.
25. Thomas M, Kalita A, Labrecque S, Pim D, Banks L, et al. (1999) Two polymorphic variants of wild-type p53 differ biochemically and biologically. *Mol Cell Biol* 19: 1092–1100.
26. Marin MC, Jost CA, Brooks LA, Irwin MS, O'Nions J, et al. (2000) A common polymorphism acts as an intragenic modifier of mutant p53 behaviour. *Nat Genet* 25: 47–54.
27. Dumont P, Leu JI, Della Pietra AC 3rd, George DL, Murphy M (2003) The codon 72 polymorphic variants of p53 have markedly different apoptotic potential. *Nat Genet* 33: 357–365.
28. Wang Z, Sturgis EM, Zhang Y, Huang Z, Zhou Q, et al. (2012) Combined p53-related genetic variants together with HPV infection increase oral cancer risk. *Int J Cancer* 131: E251–258.
29. Singhal P, Hussain S, Thakur N, Batra S, Salhan S, et al. (2013) Association of MDM2 and p53 polymorphisms with the advancement of cervical carcinoma. *DNA Cell Biol* 32: 19–27.
30. Yang J, Liu B, Li W, Xiong H, Qiu H, et al. (2013) Association of p53 and MDM2 polymorphisms with risk of human papillomavirus (HPV)-related esophageal squamous cell carcinoma (ESCC). *Cancer Epidemiol*.
31. Bond GL, Hu W, Bond EE, Robins H, Lutzker SG, et al. (2004) A single nucleotide polymorphism in the MDM2 promoter attenuates the p53 tumor suppressor pathway and accelerates tumor formation in humans. *Cell* 119: 591–602.
32. Bond GL, Hu W, Levine A (2005) A single nucleotide polymorphism in the MDM2 gene: from a molecular and cellular explanation to clinical effect. *Cancer Res* 65: 5481–5484.
33. Sato Y, Tsurumi T (2013) Genome guardian p53 and viral infections. *Rev Med Virol* 23: 213–220.
34. Tun C, Guo W, Nguyen H, Yun B, Libby RT, et al. (2007) Activation of the extrinsic caspase pathway in cultured cortical neurons requires p53-mediated down-regulation of the X-linked inhibitor of apoptosis protein to induce apoptosis. *J Neurochem* 102: 1206–1219.
35. Perfettini JL, Castedo M, Nardacci R, Ciccocanti F, Boya P, et al. (2005) Essential role of p53 phosphorylation by p38 MAPK in apoptosis induction by the HIV-1 envelope. *J Exp Med* 201: 279–289.
36. Macias D, Oya R, Saniger L, Martin F, Luque F (2009) A lentiviral vector that activates latent human immunodeficiency virus-1 proviruses by the overexpression of tat and that kills the infected cells. *Hum Gene Ther* 20: 1259–1268.
37. Verma S, Ali A, Arora S, Banerjee AC (2011) Inhibition of beta-TrCP-dependent ubiquitination of p53 by HIV-1 Vpu promotes p53-mediated apoptosis in human T cells. *Blood* 117: 6600–6607.
38. da Silveira MF, dos Santos IS (2006) Impact of an educational intervention to promote condom use among the male partners of HIV positive women. *J Eval Clin Pract* 12: 102–111.
39. Manos M, Ting Y, Wright D, Lewis A, Broker T, et al. (1989) use of polymerase chain reaction amplification for the detection of genital human papillomaviruses. *Cancer Cells* 7: 209–214.
40. Snijders PJ, van den Brule AJ, Schrijnemakers HF, Snow G, Meijer CJ, et al. (1990) The use of general primers in the polymerase chain reaction permits the detection of a broad spectrum of human papillomavirus genotypes. *J Gen Virol* 71 (Pt 1): 173–181.
41. Husnjak K, Grce M, Magdic L, Pavelic K (2000) Comparison of five different polymerase chain reaction methods for detection of human papillomavirus in cervical cell specimens. *J Virol Methods* 88: 125–134.
42. Gravitt PE, Peyton CL, Alessi TQ, Wheeler CM, Coutlee F, et al. (2000) Improved amplification of genital human papillomaviruses. *J Clin Microbiol* 38: 357–361.
43. Lin YC, Huang HI, Wang LH, Tsai CC, Lung O, et al. (2008) Polymorphisms of COX-2 -765G>C and p53 codon 72 and risks of oral squamous cell carcinoma in a Taiwan population. *Oral Oncol* 44: 798–804.
44. Sotamaa K, Liyanarachchi S, Mecklin JP, Jarvinen H, Aaltonen LA, et al. (2005) p53 codon 72 and MDM2 SNP309 polymorphisms and age of colorectal cancer onset in Lynch syndrome. *Clin Cancer Res* 11: 6840–6844.
45. Thurow HS, Hartwig FP, Alho CS, Silva DS, Roesler R, et al. (2013) Ewing Sarcoma: influence of TP53 Arg72Pro and MDM2 T309G SNPs. *Mol Biol Rep* 40: 4929–4934.
46. Hartwig FP (2013) SNP-SNP Interactions: Focusing on Variable Coding for Complex Models of Epistasis. *Journal of Genetic Syndromes & Gene Therapy*. doi: 10.4172/2157-7412.1000189.
47. Pan Q, Hu T, Moore JH (2013) Epistasis, Complexity, and Multifactor Dimensionality Reduction. In: Gondro C, Werf Jvd, Hayes B, editors. *Genome-Wide Association Studies and Genomic Prediction*. New York, NY: Humana Press. pp. 465–478.
48. Nelson RM, Kierczak M, Carlborg Ö (2013) Higher Order Interactions: Detection of Epistasis Using Machine Learning and Evolutionary Computation. In: Gondro C, Werf Jvd, Hayes B, editors. *Genome-Wide Association Studies and Genomic Prediction*. New York, NY: Humana Press. pp. 499–518.
49. Smith GD, Ebrahim S (2003) 'Mendelian randomization': can genetic epidemiology contribute to understanding environmental determinants of disease? *Int J Epidemiol* 32: 1–22.
